# Supplementary material for: Fatty Acid-Binding Protein 3 is Critical for α-Synuclein Uptake and MPP+-Induced Mitochondrial Dysfunction in Cultured Dopaminergic Neurons
Source: PubMed Central journal article supplement (PMC6862506; doi:10.3390/ijms20215358), 2019-10-28
Supplement: ijms-20-05358-s001.pdf [file ijms-20-05358-s001.pdf]

Supplementary Materials

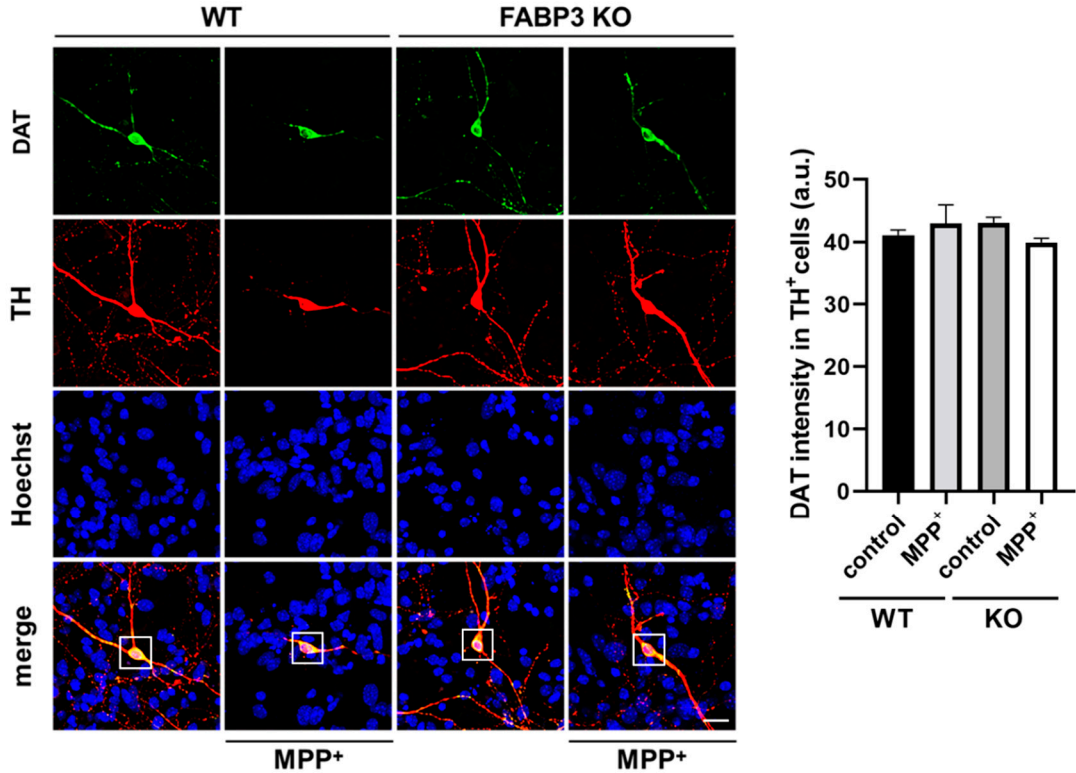

**Figure S1.** Knocking out FABP3 does not directly affect the levels of dopamine transporter (DAT) gene expression in cultured mesencephalic neurons. Scale bar: 20  $\mu$ m. Right columns show quantitative analysis of DAT immunoreactivity in TH<sup>+</sup> cells. No significance was observed,  $n > 20$ .

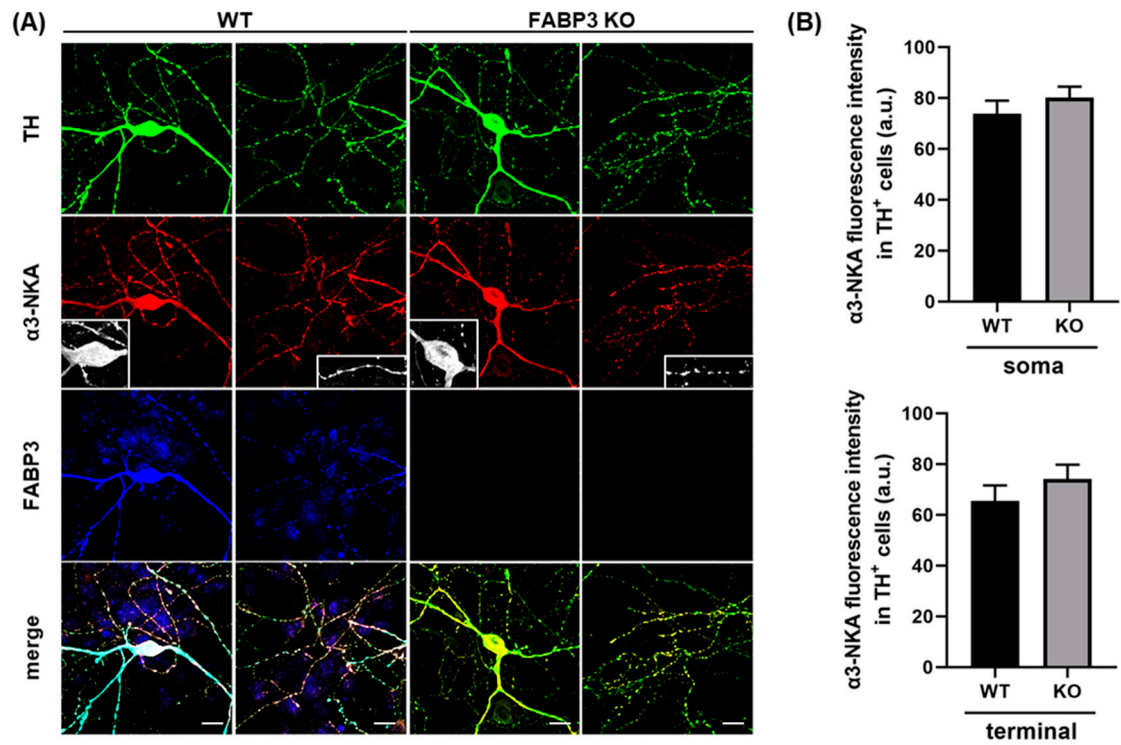

**Figure S2.** Knocking out FABP3 does not directly affect the levels of Na<sup>+</sup>/K<sup>+</sup>-ATPase (NKA)  $\alpha 3$ -subunit gene expression in cultured mesencephalic neurons. **(A)** Representative images of  $\alpha 3$ -NKA immunoreactivities (red) in TH<sup>+</sup> neurons. Scale bar: 10  $\mu$ m. **(B)** Columns show quantitative analysis of  $\alpha 3$ -NKA immunoreactivity in the cell bodies (upper) and in the terminals (lower) of TH<sup>+</sup> cells. No significance was observed,  $n > 20$ .

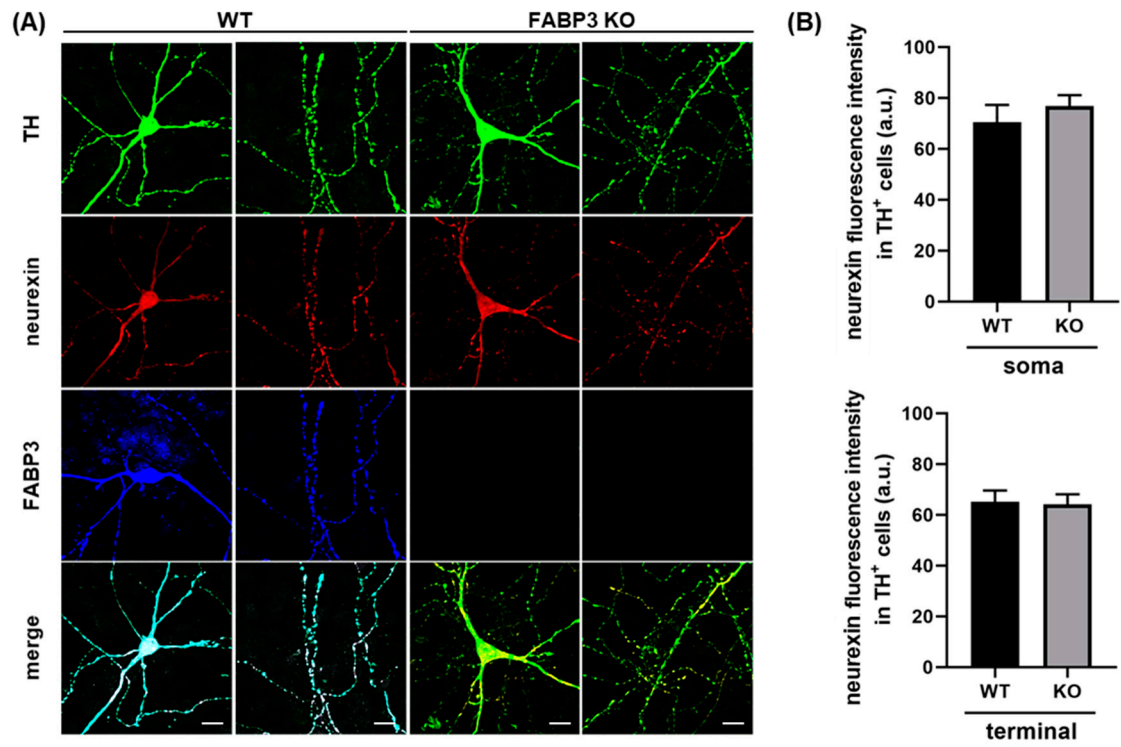

**Figure S3.** Knocking out FABP3 does not directly affect the levels of the neurexin gene expression in cultured mesencephalic neurons. **(A)** Representative images of neurexin immunoreactivities (red) in TH<sup>+</sup> neurons. Scale bar: 10  $\mu$ m. **(B)** Columns show quantitative analysis of neurexin immunoreactivity in the cell bodies (upper) and in the terminals (lower) of TH<sup>+</sup> cells. No significance was observed,  $n > 20$ .
